# Supplementary material for: Gram-Negative Bacteria Salmonella typhimurium Boost Leukotriene Synthesis Induced by Chemoattractant fMLP to Stimulate Neutrophil Swarming
Source: PubMed Central journal article supplement (PMC8764451; doi:10.3389/fphar.2021.814113), 2022-01-04
Supplement: DataSheet1.pdf [file DataSheet1.pdf]

## Supplementary Material

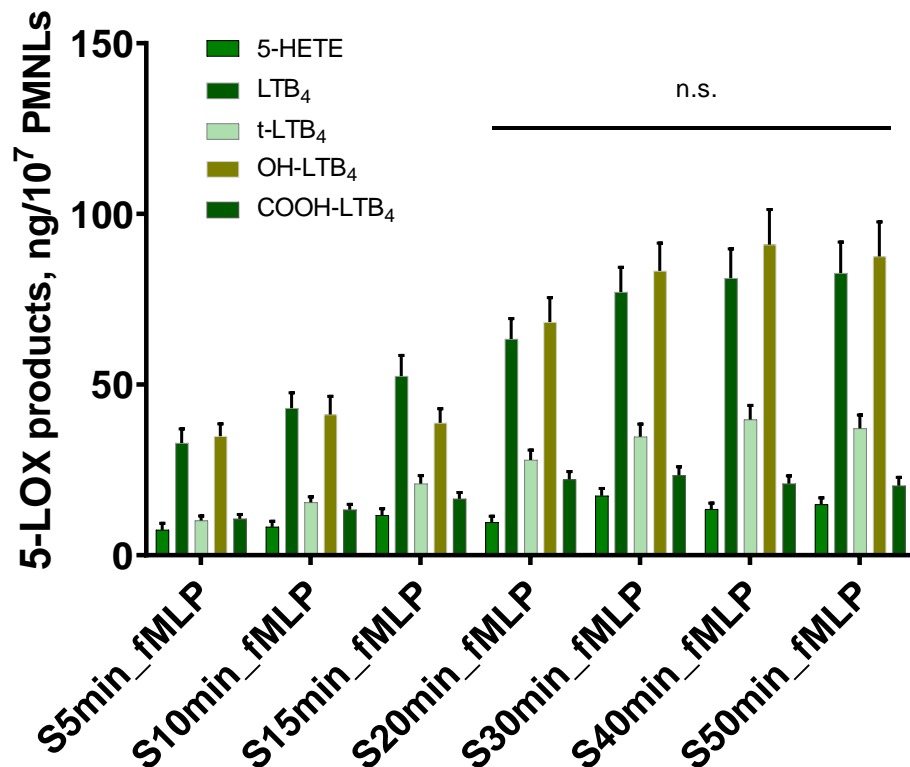

**Supplementary Figure 1.** 5-LOX product synthesis in human neutrophil at bacteria *Salmonella typhimurium* exposure (the ratio of bacteria:PMNLs ~ 25:1) followed by fMLP (0.1  $\mu$ M) addition for 10 min. PMNLs (0.9-1.0)  $\times 10^7/6$  ml were pre-incubated for 10 min at 37  $^{\circ}$ C, 5% CO<sub>2</sub>. Bacteria were added for 5-50 min, the time is indicated. The 5-LOX products were analyzed using HPLC, and data for 5-HETE, LTB<sub>4</sub>, t-LTB<sub>4</sub>,  $\omega$ -OH-LTB<sub>4</sub> and  $\omega$ -COOH-LTB<sub>4</sub> are presented. Values indicate mean  $\pm$  SEM of three independent experiments performed in duplicate. The pairs of data were compared by two-way ANOVA followed by Tukey's multiple comparison test.

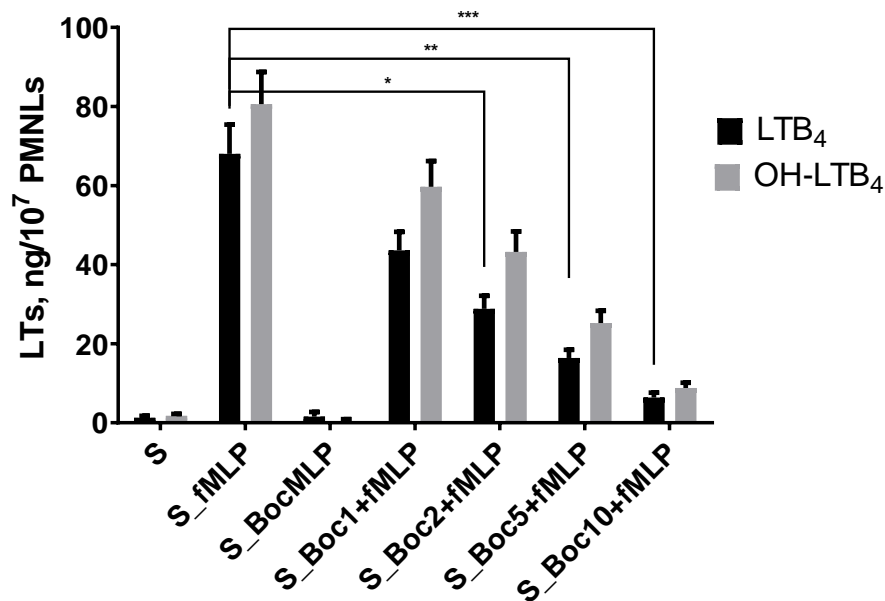

**Supplementary Figure 2.** Effect of BocMLP (Boc) on leukotriene synthesis in human neutrophil at bacteria *Salmonella typhimurium* (S) exposure followed by fMLP (0.1  $\mu$ M), or BocMLP (0.1  $\mu$ M) or BocMLP and fMLP addition for 10 min. The ratio of bacteria:PMNLs  $\sim$  25:1. PMNLs (0.9-1.0)  $\times 10^7/6$ ml were pre-incubated for 10 min at 37  $^{\circ}$ C, 5% CO<sub>2</sub>. At single treatment, S were added for 30 min. At complex treatment, bacteria were added for 30 min, then fMLP (0.1  $\mu$ M), or BocMLP (the number means 1, 2, 5, 10  $\mu$ M) and immediately fMLP were added for 10 min. The 5-LOX products were analyzed using HPLC, and data for LTB<sub>4</sub> and  $\omega$ -OH-LTB<sub>4</sub> are presented. Values indicate mean  $\pm$  SEM of three independent experiments performed in duplicate. \* $p < 0.05$ , \*\* $p < 0.01$ , \*\*\* $p < 0.001$  for pairs of data compared as indicated by two-way ANOVA followed by Tukey's multiple comparison test.

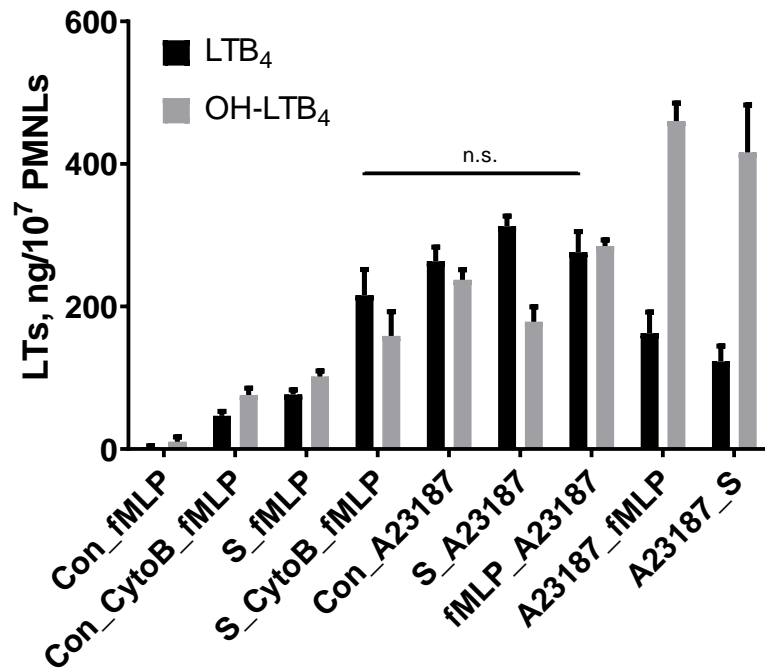

**Supplementary Figure 3.** Effect of various stimuli on leukotriene synthesis in human neutrophils. PMNLs ( $0.9-1.0 \times 10^7/6\text{ml}$ ) were pre-incubated for 10 min at  $37^\circ\text{C}$ , 5%  $\text{CO}_2$ . First, PMNLs incubated with no additives (Con) or bacteria (S) or fMLP ( $0.1 \mu\text{M}$ ) or A23187 ( $1 \mu\text{M}$ ) for 30min; then Cyto B ( $5 \mu\text{M}$ ) was added for 10 min, as indicated. Further, fMLP ( $0.1 \mu\text{M}$ ) or A23187 ( $1 \mu\text{M}$ ) or bacteria were added for 10 min, as indicated. The 5-LOX products were analyzed using HPLC, and data for LTB<sub>4</sub> and  $\omega$ -OH-LTB<sub>4</sub> are presented. Values indicate mean  $\pm$  SEM of four independent experiments performed in duplicate. The pairs of data compared by two-way ANOVA followed by Tukey's multiple comparison test.

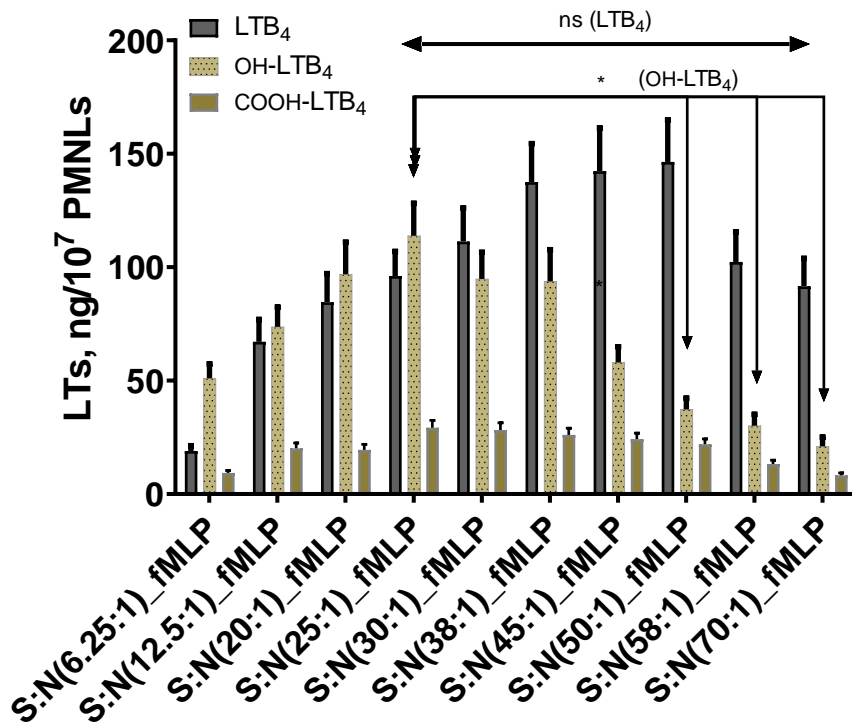

**Supplementary Figure 4.** Leukotriene synthesis in human neutrophils at various bacterial load. PMNLs ( $0.9-1.0 \times 10^7/6$  ml) were pre-incubated for 10 min at 37 °C, 5% CO<sub>2</sub>. Human neutrophils exposed to *Salmonella typhimurium* for 30 min (1<sup>st</sup> treatment) followed by fMLP (0.1 μM) addition for 10 min, the ratio of bacteria (S):PMNLs (N) is indicated. The 5-LOX products were analyzed using HPLC, and data for LTB<sub>4</sub>, ω-OH-LTB<sub>4</sub> and ω-COOH-LTB<sub>4</sub> are presented. Values indicate mean ± SEM of three independent experiments performed in duplicate. \*p < 0.05 for pairs of data compared as indicated by two-way ANOVA followed by Tukey's multiple comparison test.

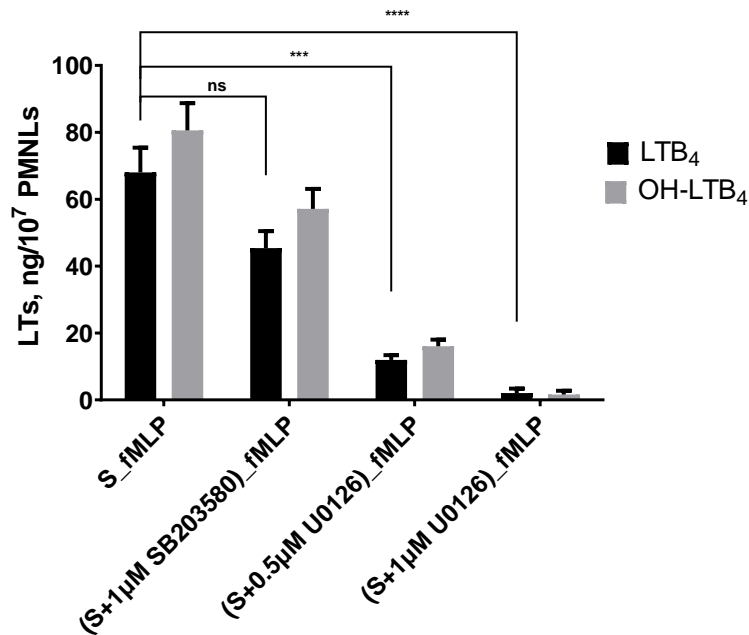

**Supplementary Figure 5.** Effect of MAPK inhibitors SB203580 and U0126 on leukotriene synthesis in human neutrophil at bacteria *Salmonella typhimurium* (S) exposure followed by fMLP (0.1 µM) addition. The ratio of bacteria:PMNLs ~ 25:1. PMNLs (0.9-1.0) x10<sup>7</sup>/6 ml were pre-incubated for 10 min at 37 °C, 5% CO<sub>2</sub>. At 1<sup>st</sup> treatment, bacteria, or bacteria plus SB203580, or bacteria plus U0126 were added for 30 min, then fMLP (0.1 µM) was added for 10 min. The 5-LOX products were analyzed using HPLC, and data for LTB<sub>4</sub> and ω-OH-LTB<sub>4</sub> are presented. Values indicate mean ± SEM of three independent experiments performed in duplicate. \*\*\*p < 0.001, \*\*\*\*p < 0.0001 for pairs of data compared as indicated by two-way ANOVA followed by Tukey's multiple comparison test.
